# Supplementary material for: Prevalence and Clinical Correlates of Comorbid Anxiety and Panic Disorders in Patients with Parkinson’s Disease
Source: MDPI journal article supplement (doi:10.3390/jcm10112302), 2021-05-25
Supplement: s1 [file s1]

**Table S1.** Differences in demographic and neurological features among PD patients without anxiety disorders, with previous or with current anxiety disorders.

|                                              | Without Anxiety<br>( <i>n</i> = 59) | Previous Anxiety<br>( <i>n</i> = 15) | Current Anxiety ( <i>n</i><br>= 26) | $\chi^2$ | <i>p</i> |
|----------------------------------------------|-------------------------------------|--------------------------------------|-------------------------------------|----------|----------|
| <b>Demographic Variables</b>                 | <b>M <math>\pm</math> SD/N (%)</b>  | <b>M <math>\pm</math> SD/N (%)</b>   | <b>M <math>\pm</math> SD/N (%)</b>  |          |          |
| Age                                          | 66.88 $\pm$ 11.07                   | 64.33 $\pm$ 13.63                    | 69.42 $\pm$ 6.71                    | 1.39     | 0.50     |
| Gender (females)                             | 20 (33.9%)                          | 9 (60%)                              | 10 (38.5%)                          | 3.43     | 0.18     |
| <b>PD Features</b>                           |                                     |                                      |                                     |          |          |
| Age of PD onset                              | 58.61 $\pm$ 13.18                   | 55.93 $\pm$ 12.6                     | 62.54 $\pm$ 7.96                    | 2.67     | 0.26     |
| PD duration (years)                          | 8.27 $\pm$ 5.62                     | 8.4 $\pm$ 6.61                       | 6.88 $\pm$ 6.72                     | 2.17     | 0.34     |
| Motor fluctuations                           | 21 (36.2%)                          | 5 (33.3%)                            | 7 (26.9%)                           | 0.70     | 0.71     |
| Involuntary movements                        | 21 (36.2%)                          | 4 (26.7%)                            | 8 (30.8%)                           | -        | 0.80     |
| PD side of onset                             |                                     |                                      |                                     | -        | 0.24     |
| Right                                        | 28 (66.7%)                          | 5 (11.9%)                            | 9 (21.4%)                           |          |          |
| Left                                         | 21 (46.7%)                          | 9 (20.5%)                            | 14 (31.8%)                          |          |          |
| Bilateral                                    | 1 (33.3%)                           | 0 (0%)                               | 2 (66.7%)                           |          |          |
| PD type                                      |                                     |                                      |                                     | -        | 0.36     |
| Rigid-acinetic                               | 25 (67.6%)                          | 3 (8.1%)                             | 9 (24.3%)                           |          |          |
| Tremor                                       | 20 (47.6%)                          | 9 (21.4%)                            | 13 (31%)                            |          |          |
| Mixed                                        | 10 (66.7%)                          | 2 (13.3%)                            | 3 (20%)                             |          |          |
| <b>Gross neuroimaging Abnormalities</b>      |                                     |                                      |                                     |          |          |
| Hyperintensities/lacunes                     | 16 (33.3%)                          | 4 (33.3%)                            | 14 (63.6%)                          | -        | 0.05     |
| Enlargement of the ventricles/ hydrocephalus | 2 (4.2%)                            | 0 (0%)                               | 3 (13.6%)                           | -        | 0.27     |
| Atrophy                                      | 15 (31.2%)                          | 3 (23.1%)                            | 10 (45.5%)                          | -        | 0.38     |
| <b>Neurological Rating Scales</b>            |                                     |                                      |                                     |          |          |
| UPDRS score (part III)                       | 24.47 $\pm$ 9.74                    | 22.36 $\pm$ 9.88                     | 22.95 $\pm$ 9.84                    | 0.83     | 0.66     |
| MMSE total score                             | 28.15 $\pm$ 3.12                    | 28.79 $\pm$ 1.76                     | 28.46 $\pm$ 1.91                    | 0.79     | 0.67     |

Pearson's  $\chi^2$  and Kruskal-Wallis'  $\chi^2$  were respectively reported for categorical and continuous variables. Abbreviations: M = mean; MMSE =

Mini-Mental State Examination; PD = parkinson disease; SD = standard deviation; UPDRS = Unified Parkinson's Disease Rating Scale.

**Table 2.** Differences in demographic and neurological features among PD patients without anxiety disorders, with lifetime persistent anxiety disorders or with lifetime panic disorders.

|                                              | Without Anxiety<br>( <i>n</i> = 59) | Persistent Anxiety<br>( <i>n</i> = 19) | Panic Disorder ( <i>n</i> = 22)    | $\chi^2$ | <i>p</i> |
|----------------------------------------------|-------------------------------------|----------------------------------------|------------------------------------|----------|----------|
| <b>Demographic Variables</b>                 | <b>M <math>\pm</math> SD/N (%)</b>  | <b>M <math>\pm</math> SD/N (%)</b>     | <b>M <math>\pm</math> SD/N (%)</b> |          |          |
| Age                                          | 66.88 $\pm$ 11.07                   | 68.05 $\pm$ 6.2                        | 67.14 $\pm$ 12.48                  | 0.06     | 0.97     |
| Gender (females)                             | 20 (33.9%)                          | 6 (31.6%)                              | 13 (59.1%)                         | 4.82     | 0.09     |
| <b>PD Features</b>                           |                                     |                                        |                                    |          |          |
| Age of PD onset                              | 58.61 $\pm$ 13.18                   | 60.68 $\pm$ 7.51                       | 59.64 $\pm$ 12.34                  | 0.23     | 0.89     |
| PD duration (years)                          | 8.27 $\pm$ 5.62                     | 7.37 $\pm$ 7.82                        | 7.5 $\pm$ 5.61                     | 1.91     | 0.39     |
| Dopamine-agonists <i>lifetime</i>            | 39 (66.1%)                          | 15 (78.9%)                             | 10 (45.5%)                         | -        | 0.08     |
| Motor fluctuations                           | 21 (36.2%)                          | 6 (31.6%)                              | 6 (27.3%)                          | 0.61     | 0.74     |
| Involuntary movements                        | 21 (36.2%)                          | 5 (26.3%)                              | 7 (31.8%)                          | 0.66     | 0.72     |
| PD side of onset                             |                                     |                                        |                                    | -        | 0.11     |
| Right                                        | 28 (66.7%)                          | 7 (16.7%)                              | 7 (16.7%)                          |          |          |
| Left                                         | 21 (46.7%)                          | 9 (20.5%)                              | 14 (31.8%)                         |          |          |
| Bilateral                                    | 1 (33.3%)                           | 2 (66.7%)                              | 0 (0%)                             |          |          |
| PD type                                      |                                     |                                        |                                    | -        | 0.20     |
| Rigid-acinetic                               | 25 (67.6%)                          | 5 (13.5%)                              | 7 (18.9%)                          |          |          |
| Tremor                                       | 20 (47.6%)                          | 9 (21.4%)                              | 13 (31%)                           |          |          |
| Mixed                                        | 10 (66.7%)                          | 4 (26.7%)                              | 1 (6.7%)                           |          |          |
| <b>Gross neuroimaging Abnormalities</b>      |                                     |                                        |                                    |          |          |
| Hyperintensities/lacunes                     | 16 (33.3%)                          | 9 (60%)                                | 9 (47.4%)                          | 3.70     | 0.16     |
| Enlargement of the ventricles/ hydrocephalus | 2 (4.2%)                            | 2 (13.3%)                              | 1 (5%)                             | -        | 0.36     |
| Atrophy                                      | 15 (31.2%)                          | 5 (33.3%)                              | 8 (40%)                            | 0.48     | 0.78     |
| <b>Neurological Rating Scales</b>            |                                     |                                        |                                    |          |          |
| UPDRS score (part III)                       | 24.47 $\pm$ 9.74                    | 23.24 $\pm$ 8.85                       | 22.26 $\pm$ 10.66                  | 1.10     | 0.58     |
| MMSE total score                             | 28.15 $\pm$ 3.12                    | 28.76 $\pm$ 1.44                       | 28.43 $\pm$ 2.13                   | 0.27     | 0.87     |

Pearson's  $\chi^2$  and Kruskal-Wallis'  $\chi^2$  were respectively reported for categorical and continuous variables.
